# Supplementary material for: Stereochemical control of H2O2 dismutation by Hangman porphyrins
Source: Royal Society of Chemistry journal article supplement (doi:10.1039/b616884a), 2007-01-01
Supplement: b616884a.pdf [file b616884a.pdf]

Supporting Information for

**Stereochemical Control of H<sub>2</sub>O<sub>2</sub> Dismutation by a Set of Hangman  
Porphyrin Xanthene Architectures**

Joel Rosenthal, Leng Leng Chng, Stephen D. Fried and Daniel G. Nocera\*

*Department of Chemistry, 6–335, Massachusetts Institute of Technology, 77 Massachusetts Avenue,  
Cambridge, MA 02139–4307*

| <i>Index</i>                                                                                                            | <i>Page</i> |
|-------------------------------------------------------------------------------------------------------------------------|-------------|
| X-ray crystal structure solution of the freebase precursor to <b>3</b>                                                  | S2 – S15    |
| Figure S1: Reaction profiles for H <sub>2</sub> O <sub>2</sub> dismutation by Hangman porphyrin<br>xanthene derivatives | S16         |

**Table S1.** Crystal data, structure solution and refinement for the freebase precursor to **3**

|                                                                             |                                                                               |
|-----------------------------------------------------------------------------|-------------------------------------------------------------------------------|
| Empirical formula                                                           | C <sub>62</sub> H <sub>39</sub> F <sub>15</sub> N <sub>4</sub> O <sub>3</sub> |
| Formula weight                                                              | 1730.63                                                                       |
| Temperature                                                                 | 183(2) K                                                                      |
| $\lambda$ (Å)                                                               | 0.71073                                                                       |
| crystal system                                                              | Orthorhombic                                                                  |
| space group                                                                 | Pca2 <sub>1</sub>                                                             |
| <i>a</i> (Å)                                                                | 23.784(3)                                                                     |
| <i>b</i> (Å)                                                                | 14.5290(16)                                                                   |
| <i>c</i> (Å)                                                                | 16.258(2)                                                                     |
| $\alpha$ (deg)                                                              | 90                                                                            |
| $\beta$ (deg)                                                               | 90                                                                            |
| $\gamma$ (deg)                                                              | 90                                                                            |
| <i>V</i> (Å <sup>3</sup> )                                                  | 5618.1(12)                                                                    |
| <i>Z</i>                                                                    | 4                                                                             |
| $\rho_{\text{calcd}}$ (Mg mm <sup>-3</sup> )                                | 1.387                                                                         |
| crystal size (mm <sup>3</sup> )                                             | 0.15 × 0.10 × 0.04                                                            |
| abs coeff (mm <sup>-1</sup> )                                               | 8.903                                                                         |
| <i>F</i> (000)                                                              | 2392                                                                          |
| $\theta$ range for data collection                                          | 2.12 to 20.00°                                                                |
| limiting indices                                                            | -22 ≤ <i>h</i> ≤ 22, -9 ≤ <i>k</i> ≤ 13, -15 ≤ <i>l</i> ≤ 15                  |
| no. of reflns colld                                                         | 15956                                                                         |
| no. of ind reflns ( <i>R</i> <sub>int</sub> )                               | 5035 (0.0786)                                                                 |
| completeness to $\theta = 23.25^\circ$                                      | 99.7 %                                                                        |
| absorption corr                                                             | SADABS                                                                        |
| refinement method                                                           | Full-matrix least-squares on <i>F</i> <sup>2</sup>                            |
| data / restraints / parameters                                              | 5035/ 1 / 767                                                                 |
| <i>R</i> 1, <sup>a</sup> <i>wR</i> 2 <sup>b</sup> [ <i>I</i> > 2 $\sigma$ ] | 0.0708, 0.1712                                                                |
| <i>R</i> 1, <sup>a</sup> <i>wR</i> 2 <sup>b</sup> (all data)                | 0.0955, 0.1842                                                                |
| GOF <sup>c</sup> on <i>F</i> <sup>2</sup>                                   | 1.067                                                                         |
| largest diff. peak and hole                                                 | 0.647 and -0.223 eÅ <sup>-3</sup>                                             |

<sup>a</sup>  $R1 = \sum ||F_o - |F_c|| / \sum |F_o|$ . <sup>b</sup>  $wR2 = (\sum (w(F_o^2 - F_c^2)^2) / \sum (w(F_o^2)^2))^{1/2}$ . <sup>c</sup>  $GOF = (\sum w(F_o^2 - F_c^2)^2 / (n - p))^{1/2}$  where *n* is the number of data and *p* is the number of parameters refined.

**Table S2.** Atomic coordinates ( $\times 10^4$ ) and equivalent isotropic displacement parameters ( $\text{\AA}^2 \times 10^3$ ) for the freebase precursor to **3**

| Atom  | x       | y       | z        | $U_{\text{eq}}^a$ |
|-------|---------|---------|----------|-------------------|
| N(1)  | 3476(3) | 5440(5) | 657(5)   | 45(2)             |
| N(2)  | 4190(3) | 7069(5) | 731(5)   | 43(2)             |
| N(3)  | 3742(3) | 7513(5) | 2337(5)  | 46(2)             |
| N(4)  | 3005(3) | 5897(5) | 2236(5)  | 47(2)             |
| O(1)  | 5382(3) | 8835(4) | 2319(4)  | 57(2)             |
| O(2)  | 5380(3) | 7048(5) | 2461(6)  | 89(3)             |
| O(3)  | 6159(3) | 6398(5) | 2816(4)  | 61(2)             |
| C(1)  | 4390(4) | 8492(6) | 1510(6)  | 39(2)             |
| C(2)  | 4448(4) | 7923(6) | 836(6)   | 41(2)             |
| C(3)  | 4808(4) | 8086(6) | 161(6)   | 41(2)             |
| C(4)  | 4786(4) | 7345(7) | -335(7)  | 54(3)             |
| C(5)  | 4382(4) | 6708(6) | 8(7)     | 45(2)             |
| C(6)  | 4204(4) | 5877(6) | -339(6)  | 42(2)             |
| C(7)  | 3792(4) | 5319(6) | -41(6)   | 47(3)             |
| C(8)  | 3583(4) | 4497(7) | -458(6)  | 55(3)             |
| C(9)  | 3144(5) | 4189(6) | -5(6)    | 54(3)             |
| C(10) | 3084(4) | 4756(6) | 701(6)   | 48(3)             |
| C(11) | 2695(4) | 4660(6) | 1344(7)  | 48(3)             |
| C(12) | 2661(4) | 5192(6) | 2059(6)  | 41(2)             |
| C(13) | 2284(4) | 5051(7) | 2731(6)  | 55(3)             |
| C(14) | 2400(4) | 5673(7) | 3301(6)  | 51(3)             |
| C(15) | 2862(4) | 6234(6) | 3015(6)  | 44(2)             |
| C(16) | 3099(4) | 6971(6) | 3397(6)  | 43(2)             |
| C(17) | 3498(4) | 7558(6) | 3094(6)  | 44(2)             |
| C(18) | 3700(4) | 8385(7) | 3483(6)  | 56(3)             |
| C(19) | 4045(4) | 8836(7) | 2937(7)  | 55(3)             |
| C(20) | 4085(4) | 8270(7) | 2209(7)  | 47(3)             |
| C(21) | 4485(4) | 5584(7) | -1116(7) | 52(3)             |

|       |         |          |           |       |
|-------|---------|----------|-----------|-------|
| C(22) | 4925(5) | 4962(8)  | -1158(8)  | 67(3) |
| C(23) | 5184(5) | 4688(9)  | -1864(11) | 82(4) |
| C(24) | 5012(7) | 5091(11) | -2599(10) | 88(4) |
| C(25) | 4586(6) | 5692(9)  | -2605(7)  | 66(3) |
| C(26) | 4321(5) | 5948(7)  | -1887(7)  | 56(3) |
| C(27) | 2270(5) | 3907(8)  | 1214(6)   | 53(3) |
| C(28) | 2411(5) | 2995(8)  | 1290(6)   | 55(3) |
| C(29) | 2041(6) | 2295(7)  | 1075(6)   | 61(3) |
| C(30) | 1493(6) | 2526(11) | 864(7)    | 72(3) |
| C(31) | 1335(6) | 3439(11) | 799(8)    | 79(4) |
| C(32) | 1713(5) | 4075(8)  | 981(7)    | 61(3) |
| C(33) | 2880(4) | 7200(7)  | 4233(6)   | 50(3) |
| C(34) | 2417(5) | 7739(8)  | 4354(7)   | 66(3) |
| C(35) | 2223(5) | 8003(8)  | 5114(9)   | 72(3) |
| C(36) | 2494(5) | 7691(8)  | 5785(8)   | 59(3) |
| C(37) | 2937(5) | 7158(7)  | 5721(7)   | 56(3) |
| C(38) | 3137(4) | 6907(7)  | 4947(7)   | 54(3) |
| C(39) | 4669(4) | 9397(6)  | 1466(6)   | 41(2) |
| C(40) | 4438(4) | 10119(6) | 1021(6)   | 52(3) |
| C(41) | 4680(4) | 10995(7) | 976(6)    | 56(3) |
| C(42) | 5167(4) | 11102(7) | 1398(7)   | 54(3) |
| C(43) | 5431(4) | 10413(7) | 1863(6)   | 43(3) |
| C(44) | 5158(4) | 9579(7)  | 1862(6)   | 48(3) |
| C(45) | 5947(4) | 10585(7) | 2384(9)   | 75(4) |
| C(46) | 6233(4) | 9674(7)  | 2627(6)   | 47(3) |
| C(47) | 5935(4) | 8868(7)  | 2579(6)   | 48(3) |
| C(48) | 6177(4) | 8022(6)  | 2788(5)   | 43(2) |
| C(49) | 6732(4) | 8045(7)  | 3085(6)   | 51(3) |
| C(50) | 7038(4) | 8836(8)  | 3157(7)   | 56(3) |
| C(51) | 6772(4) | 9639(8)  | 2925(6)   | 56(3) |
| C(52) | 5902(5) | 7141(8)  | 2694(6)   | 55(3) |

|       |         |           |          |        |
|-------|---------|-----------|----------|--------|
| C(53) | 4416(5) | 11782(7)  | 492(8)   | 79(4)  |
| C(54) | 4802(7) | 11984(12) | -237(13) | 164(9) |
| C(55) | 3830(5) | 11540(7)  | 151(8)   | 85(4)  |
| C(56) | 4358(7) | 12601(8)  | 1083(13) | 151(8) |
| C(57) | 7633(5) | 8867(8)   | 3492(7)  | 74(3)  |
| C(58) | 7653(6) | 9550(10)  | 4256(8)  | 112(5) |
| C(59) | 8039(4) | 9231(9)   | 2837(8)  | 83(4)  |
| C(60) | 7841(6) | 7925(9)   | 3768(10) | 109(5) |
| C(61) | 5769(5) | 11086(9)  | 3218(9)  | 101(4) |
| C(62) | 6365(5) | 11208(9)  | 1961(10) | 124(6) |
| F(1)  | 5096(3) | 4592(4)   | -430(5)  | 95(2)  |
| F(2)  | 5615(3) | 4118(6)   | -1835(5) | 131(3) |
| F(3)  | 5271(3) | 4860(6)   | -3294(5) | 124(3) |
| F(4)  | 4420(3) | 6065(5)   | -3322(4) | 96(2)  |
| F(5)  | 3899(3) | 6560(4)   | -1909(4) | 74(2)  |
| F(6)  | 2934(3) | 2743(4)   | 1523(4)  | 79(2)  |
| F(7)  | 2208(3) | 1407(4)   | 1159(4)  | 87(2)  |
| F(8)  | 1148(3) | 1814(5)   | 670(4)   | 100(2) |
| F(9)  | 825(3)  | 3609(6)   | 565(6)   | 132(3) |
| F(10) | 1548(3) | 4942(5)   | 928(5)   | 103(2) |
| F(11) | 3608(3) | 6404(4)   | 4877(3)  | 78(2)  |
| F(12) | 3205(3) | 6842(4)   | 6389(4)  | 92(2)  |
| F(13) | 2325(3) | 7966(4)   | 6543(4)  | 94(2)  |
| F(14) | 1775(3) | 8560(5)   | 5181(5)  | 104(2) |
| F(15) | 2133(2) | 8058(5)   | 3687(4)  | 87(2)  |

---

<sup>a</sup>  $U_{eq}$  is defined as one third of the trace of the orthogonalized  $U_{ij}$  tensor.

**Table S3.** Bond lengths (in Å) for the freebase precursor to **3**

| Bond        | Distance  | Bond        | Distance  |
|-------------|-----------|-------------|-----------|
| N(1)–C(10)  | 1.365(11) | C(11)–C(12) | 1.398(13) |
| N(1)–C(7)   | 1.372(12) | C(11)–C(27) | 1.505(13) |
| N(2)–C(5)   | 1.366(12) | C(12)–C(13) | 1.429(12) |
| N(2)–C(2)   | 1.395(10) | C(13)–C(14) | 1.323(12) |
| N(3)–C(17)  | 1.362(12) | C(14)–C(15) | 1.445(12) |
| N(3)–C(20)  | 1.385(12) | C(15)–C(16) | 1.360(12) |
| N(4)–C(12)  | 1.342(11) | C(16)–C(17) | 1.367(12) |
| N(4)–C(15)  | 1.400(12) | C(16)–C(33) | 1.495(14) |
| O(1)–C(47)  | 1.382(11) | C(17)–C(18) | 1.440(13) |
| O(1)–C(44)  | 1.416(11) | C(18)–C(19) | 1.374(13) |
| O(2)–C(52)  | 1.305(12) | C(19)–C(20) | 1.445(14) |
| O(3)–C(52)  | 1.256(11) | C(21)–C(22) | 1.385(15) |
| C(1)–C(2)   | 1.380(12) | C(21)–C(26) | 1.416(15) |
| C(1)–C(20)  | 1.384(13) | C(22)–C(23) | 1.362(17) |
| C(1)–C(39)  | 1.476(12) | C(22)–F(1)  | 1.363(13) |
| C(2)–C(3)   | 1.412(12) | C(23)–F(2)  | 1.318(14) |
| C(3)–C(4)   | 1.347(12) | C(23)–C(24) | 1.392(19) |
| C(4)–C(5)   | 1.446(13) | C(24)–F(3)  | 1.331(14) |
| C(5)–C(6)   | 1.398(12) | C(24)–C(25) | 1.337(17) |
| C(6)–C(7)   | 1.362(13) | C(25)–F(4)  | 1.345(13) |
| C(6)–C(21)  | 1.491(13) | C(25)–C(26) | 1.377(15) |
| C(7)–C(8)   | 1.460(13) | C(26)–F(5)  | 1.341(11) |
| C(8)–C(9)   | 1.354(13) | C(27)–C(28) | 1.373(13) |
| C(9)–C(10)  | 1.421(13) | C(27)–C(32) | 1.399(14) |
| C(10)–C(11) | 1.402(13) | C(28)–F(6)  | 1.350(11) |
| C(28)–C(29) | 1.390(14) | C(41)–C(42) | 1.357(13) |
| C(29)–F(7)  | 1.356(12) | C(41)–C(53) | 1.524(14) |

|             |           |             |           |
|-------------|-----------|-------------|-----------|
| C(29)–C(30) | 1.389(16) | C(42)–C(43) | 1.402(13) |
| C(30)–F(8)  | 1.358(12) | C(43)–C(44) | 1.376(12) |
| C(30)–C(31) | 1.383(16) | C(43)–C(45) | 1.511(14) |
| C(31)–F(9)  | 1.295(13) | C(45)–C(62) | 1.511(16) |
| C(31)–C(32) | 1.322(15) | C(45)–C(46) | 1.540(14) |
| C(32)–F(10) | 1.322(11) | C(45)–C(61) | 1.596(17) |
| C(33)–C(34) | 1.366(15) | C(46)–C(51) | 1.370(13) |
| C(33)–C(38) | 1.378(14) | C(46)–C(47) | 1.371(12) |
| C(34)–F(15) | 1.359(12) | C(47)–C(48) | 1.400(12) |
| C(34)–C(35) | 1.373(16) | C(48)–C(49) | 1.406(13) |
| C(35)–F(14) | 1.342(13) | C(48)–C(52) | 1.445(14) |
| C(35)–C(36) | 1.345(16) | C(49)–C(50) | 1.365(13) |
| C(36)–C(37) | 1.312(14) | C(50)–C(51) | 1.380(13) |
| C(36)–F(13) | 1.356(12) | C(50)–C(57) | 1.516(14) |
| C(37)–F(12) | 1.341(11) | C(53)–C(54) | 1.53(2)   |
| C(37)–C(38) | 1.394(15) | C(53)–C(56) | 1.536(19) |
| C(38)–F(11) | 1.342(11) | C(53)–C(55) | 1.540(15) |
| C(39)–C(44) | 1.355(12) | C(57)–C(60) | 1.522(15) |
| C(39)–C(40) | 1.388(12) | C(57)–C(59) | 1.531(15) |
| C(40)–C(41) | 1.399(12) | C(57)–C(58) | 1.591(17) |

---

**Table S4.** Bond angles (in deg) for the freebase precursor to **3**

| Bond Angle       | Angle     | Bond Angle        | Angle     |
|------------------|-----------|-------------------|-----------|
| C(10)–N(1)–C(7)  | 108.9(8)  | C(11)–C(10)–C(9)  | 127.7(9)  |
| C(5)–N(2)–C(2)   | 107.4(7)  | C(12)–C(11)–C(10) | 127.0(8)  |
| C(17)–N(3)–C(20) | 110.5(8)  | C(12)–C(11)–C(27) | 118.7(9)  |
| C(12)–N(4)–C(15) | 108.2(7)  | C(10)–C(11)–C(27) | 114.3(9)  |
| C(47)–O(1)–C(44) | 119.5(7)  | N(4)–C(12)–C(11)  | 124.4(8)  |
| C(2)–C(1)–C(20)  | 124.4(8)  | N(4)–C(12)–C(13)  | 109.2(8)  |
| C(2)–C(1)–C(39)  | 116.7(8)  | C(11)–C(12)–C(13) | 126.3(9)  |
| C(20)–C(1)–C(39) | 118.9(9)  | C(14)–C(13)–C(12) | 107.9(9)  |
| C(1)–C(2)–N(2)   | 125.8(8)  | C(13)–C(14)–C(15) | 108.6(9)  |
| C(1)–C(2)–C(3)   | 125.3(9)  | C(16)–C(15)–N(4)  | 126.0(8)  |
| N(2)–C(2)–C(3)   | 108.8(8)  | C(16)–C(15)–C(14) | 127.8(10) |
| C(4)–C(3)–C(2)   | 107.9(8)  | N(4)–C(15)–C(14)  | 106.2(8)  |
| C(3)–C(4)–C(5)   | 107.9(8)  | C(15)–C(16)–C(17) | 127.9(9)  |
| N(2)–C(5)–C(6)   | 125.3(9)  | C(15)–C(16)–C(33) | 116.5(8)  |
| N(2)–C(5)–C(4)   | 108.0(8)  | C(17)–C(16)–C(33) | 115.5(9)  |
| C(6)–C(5)–C(4)   | 126.8(10) | N(3)–C(17)–C(16)  | 126.2(9)  |
| C(7)–C(6)–C(5)   | 126.1(9)  | N(3)–C(17)–C(18)  | 107.1(8)  |
| C(7)–C(6)–C(21)  | 117.0(8)  | C(16)–C(17)–C(18) | 126.4(10) |
| C(5)–C(6)–C(21)  | 116.9(9)  | C(19)–C(18)–C(17) | 108.3(9)  |
| C(6)–C(7)–N(1)   | 127.8(8)  | C(18)–C(19)–C(20) | 107.4(8)  |
| C(6)–C(7)–C(8)   | 124.5(10) | C(1)–C(20)–N(3)   | 128.0(9)  |
| N(1)–C(7)–C(8)   | 107.6(9)  | C(1)–C(20)–C(19)  | 125.1(9)  |
| C(9)–C(8)–C(7)   | 106.3(9)  | N(3)–C(20)–C(19)  | 106.7(9)  |
| C(8)–C(9)–C(10)  | 109.0(9)  | C(22)–C(21)–C(26) | 114.1(10) |
| N(1)–C(10)–C(11) | 124.2(9)  | C(22)–C(21)–C(6)  | 124.6(10) |
| N(1)–C(10)–C(9)  | 108.1(9)  | C(26)–C(21)–C(6)  | 121.3(10) |
| C(23)–C(22)–F(1) | 118.9(12) | F(10)–C(32)–C(31) | 116.7(12) |



|                   |           |                   |           |
|-------------------|-----------|-------------------|-----------|
| C(23)–C(22)–C(21) | 125.1(13) | F(10)–C(32)–C(27) | 117.7(9)  |
| F(1)–C(22)–C(21)  | 116.0(11) | C(31)–C(32)–C(27) | 125.6(12) |
| F(2)–C(23)–C(22)  | 120.3(16) | C(34)–C(33)–C(38) | 114.4(10) |
| F(2)–C(23)–C(24)  | 121.7(13) | C(34)–C(33)–C(16) | 122.7(10) |
| C(22)–C(23)–C(24) | 117.8(12) | C(38)–C(33)–C(16) | 122.8(10) |
| F(3)–C(24)–C(25)  | 120.7(16) | F(15)–C(34)–C(33) | 118.8(11) |
| F(3)–C(24)–C(23)  | 119.0(15) | F(15)–C(34)–C(35) | 117.1(12) |
| C(25)–C(24)–C(23) | 120.3(12) | C(33)–C(34)–C(35) | 124.1(11) |
| C(24)–C(25)–F(4)  | 119.4(13) | F(14)–C(35)–C(36) | 121.1(12) |
| C(24)–C(25)–C(26) | 121.1(13) | F(14)–C(35)–C(34) | 120.5(13) |
| F(4)–C(25)–C(26)  | 119.5(12) | C(36)–C(35)–C(34) | 118.3(11) |
| F(5)–C(26)–C(25)  | 119.9(11) | C(37)–C(36)–C(35) | 121.3(11) |
| F(5)–C(26)–C(21)  | 118.6(10) | C(37)–C(36)–F(13) | 118.9(12) |
| C(25)–C(26)–C(21) | 121.5(11) | C(35)–C(36)–F(13) | 119.7(11) |
| C(28)–C(27)–C(32) | 115.1(10) | C(36)–C(37)–F(12) | 121.3(11) |
| C(28)–C(27)–C(11) | 121.6(10) | C(36)–C(37)–C(38) | 120.0(10) |
| C(32)–C(27)–C(11) | 123.3(10) | F(12)–C(37)–C(38) | 118.7(10) |
| F(6)–C(28)–C(27)  | 120.9(9)  | F(11)–C(38)–C(33) | 117.9(10) |
| F(6)–C(28)–C(29)  | 117.0(11) | F(11)–C(38)–C(37) | 120.2(10) |
| C(27)–C(28)–C(29) | 122.0(11) | C(33)–C(38)–C(37) | 121.8(10) |
| F(7)–C(29)–C(30)  | 122.0(11) | C(44)–C(39)–C(40) | 116.1(9)  |
| F(7)–C(29)–C(28)  | 119.0(13) | C(44)–C(39)–C(1)  | 122.5(8)  |
| C(30)–C(29)–C(28) | 118.6(11) | C(40)–C(39)–C(1)  | 121.4(8)  |
| F(8)–C(30)–C(31)  | 123.3(13) | C(39)–C(40)–C(41) | 123.5(9)  |
| F(8)–C(30)–C(29)  | 116.1(13) | C(42)–C(41)–C(40) | 115.4(10) |
| C(31)–C(30)–C(29) | 120.4(11) | C(42)–C(41)–C(53) | 121.9(10) |
| F(9)–C(31)–C(32)  | 124.7(14) | C(40)–C(41)–C(53) | 122.7(9)  |
| F(9)–C(31)–C(30)  | 117.4(12) | C(41)–C(42)–C(43) | 125.0(9)  |
| C(32)–C(31)–C(30) | 117.9(12) | C(44)–C(43)–C(42) | 114.6(9)  |
| C(44)–C(43)–C(45) | 122.0(9)  | C(49)–C(48)–C(52) | 118.9(9)  |

|                   |           |                   |           |
|-------------------|-----------|-------------------|-----------|
| C(42)–C(43)–C(45) | 123.3(9)  | C(50)–C(49)–C(48) | 123.4(10) |
| C(39)–C(44)–C(43) | 125.3(9)  | C(49)–C(50)–C(51) | 116.3(9)  |
| C(39)–C(44)–O(1)  | 115.0(9)  | C(49)–C(50)–C(57) | 123.6(11) |
| C(43)–C(44)–O(1)  | 119.6(9)  | C(51)–C(50)–C(57) | 120.1(10) |
| C(43)–C(45)–C(62) | 112.2(10) | C(46)–C(51)–C(50) | 123.9(9)  |
| C(43)–C(45)–C(46) | 111.2(9)  | O(3)–C(52)–O(2)   | 114.8(10) |
| C(62)–C(45)–C(46) | 109.9(9)  | O(3)–C(52)–C(48)  | 121.6(10) |
| C(43)–C(45)–C(61) | 109.7(9)  | O(2)–C(52)–C(48)  | 123.7(10) |
| C(62)–C(45)–C(61) | 106.7(11) | C(41)–C(53)–C(54) | 107.3(10) |
| C(46)–C(45)–C(61) | 107.0(10) | C(41)–C(53)–C(56) | 107.2(11) |
| C(51)–C(46)–C(47) | 118.2(9)  | C(54)–C(53)–C(55) | 113.0(13) |
| C(51)–C(46)–C(45) | 122.4(9)  | C(56)–C(53)–C(55) | 112.8(9)  |
| C(47)–C(46)–C(45) | 119.3(9)  | C(50)–C(57)–C(60) | 107.9(12) |
| C(46)–C(47)–O(1)  | 122.7(9)  | C(50)–C(57)–C(59) | 108.7(11) |
| C(46)–C(47)–C(48) | 121.5(9)  | C(60)–C(57)–C(59) | 112.4(10) |
| O(1)–C(47)–C(48)  | 115.8(8)  | C(50)–C(57)–C(58) | 110.4(9)  |
| C(47)–C(48)–C(49) | 116.6(9)  | C(60)–C(57)–C(58) | 108.1(11) |
| C(47)–C(48)–C(52) | 124.4(9)  | C(59)–C(57)–C(58) | 109.1(10) |

---

**Table S5.** Anisotropic thermal displacement parameters ( $\text{\AA}^2 \times 10^3$ ) for the freebase precursor to **3**

| Atom  | U <sup>11</sup> | U <sup>22</sup> | U <sup>33</sup> | U <sup>23</sup> | U <sup>13</sup> | U <sup>12</sup> |
|-------|-----------------|-----------------|-----------------|-----------------|-----------------|-----------------|
| N(1)  | 62(5)           | 45(5)           | 29(5)           | -7(4)           | -6(4)           | -1(4)           |
| N(2)  | 57(5)           | 38(5)           | 36(5)           | -1(4)           | -9(4)           | 1(4)            |
| N(3)  | 52(5)           | 45(5)           | 41(6)           | -6(4)           | -7(4)           | -10(4)          |
| N(4)  | 61(5)           | 38(5)           | 44(6)           | -1(4)           | -8(4)           | -11(4)          |
| O(1)  | 41(4)           | 50(4)           | 79(5)           | 1(4)            | -11(4)          | -7(3)           |
| O(2)  | 60(5)           | 52(5)           | 155(9)          | 24(5)           | -40(5)          | -3(4)           |
| O(3)  | 59(5)           | 65(5)           | 60(5)           | 16(4)           | 0(4)            | -2(4)           |
| C(1)  | 38(6)           | 50(7)           | 29(6)           | 21(5)           | 1(5)            | -5(5)           |
| C(2)  | 52(6)           | 44(7)           | 26(6)           | 9(5)            | 2(5)            | -2(5)           |
| C(3)  | 48(6)           | 27(6)           | 47(7)           | -5(5)           | -13(5)          | -11(5)          |
| C(4)  | 49(7)           | 57(7)           | 55(7)           | 19(7)           | 15(5)           | 1(5)            |
| C(5)  | 53(6)           | 36(6)           | 45(6)           | 6(6)            | -11(6)          | 7(5)            |
| C(6)  | 55(6)           | 32(6)           | 39(6)           | -9(5)           | 0(5)            | -8(5)           |
| C(7)  | 75(7)           | 41(6)           | 25(6)           | -7(5)           | -18(6)          | -6(6)           |
| C(8)  | 65(8)           | 55(7)           | 44(6)           | 7(6)            | 2(6)            | 5(5)            |
| C(9)  | 73(8)           | 52(6)           | 38(6)           | -6(6)           | -19(6)          | -7(6)           |
| C(10) | 58(7)           | 43(6)           | 45(7)           | 5(6)            | -10(6)          | -17(5)          |
| C(11) | 38(6)           | 40(6)           | 66(8)           | 12(6)           | -17(6)          | -18(5)          |
| C(12) | 49(6)           | 43(6)           | 30(6)           | -9(5)           | -8(5)           | -16(5)          |
| C(13) | 58(7)           | 65(7)           | 41(7)           | 7(6)            | 3(6)            | -18(5)          |
| C(14) | 53(7)           | 60(7)           | 40(6)           | -10(6)          | -5(5)           | -10(5)          |
| C(15) | 39(6)           | 38(6)           | 55(8)           | 2(6)            | -2(5)           | -11(5)          |
| C(16) | 46(6)           | 41(6)           | 42(6)           | 3(5)            | 2(5)            | -9(5)           |
| C(17) | 46(6)           | 48(7)           | 38(7)           | 1(6)            | -7(5)           | -4(5)           |
| C(18) | 53(7)           | 67(8)           | 48(7)           | -33(6)          | 5(6)            | -4(6)           |
| C(19) | 51(6)           | 44(6)           | 71(8)           | -19(7)          | 6(6)            | -13(5)          |
| C(20) | 42(6)           | 40(6)           | 60(8)           | 1(6)            | -23(6)          | 3(5)            |
| C(21) | 51(7)           | 49(7)           | 55(8)           | -7(6)           | 9(6)            | -20(6)          |

|       |         |         |         |         |        |        |
|-------|---------|---------|---------|---------|--------|--------|
| C(22) | 65(8)   | 51(7)   | 84(10)  | 8(7)    | -2(8)  | 2(6)   |
| C(23) | 65(9)   | 88(10)  | 94(12)  | -36(9)  | 42(9)  | 10(7)  |
| C(24) | 104(11) | 92(10)  | 68(11)  | -35(10) | 37(9)  | -7(9)  |
| C(25) | 87(9)   | 71(8)   | 41(9)   | -10(7)  | 11(8)  | -17(7) |
| C(26) | 64(7)   | 57(7)   | 48(8)   | 2(7)    | 7(7)   | -12(6) |
| C(27) | 64(8)   | 60(8)   | 35(6)   | 0(5)    | 2(5)   | -5(7)  |
| C(28) | 51(7)   | 70(9)   | 44(7)   | 3(6)    | -2(6)  | -2(7)  |
| C(29) | 104(11) | 40(7)   | 40(7)   | -8(5)   | 20(7)  | -23(8) |
| C(30) | 69(10)  | 101(11) | 46(7)   | -2(7)   | 3(6)   | -48(9) |
| C(31) | 71(10)  | 92(11)  | 73(9)   | 14(8)   | -25(7) | -21(9) |
| C(32) | 65(9)   | 53(8)   | 65(8)   | -3(6)   | -17(6) | -26(8) |
| C(33) | 48(7)   | 54(7)   | 48(8)   | -8(6)   | -1(6)  | -14(5) |
| C(34) | 61(8)   | 85(9)   | 50(8)   | 15(7)   | -11(7) | -13(7) |
| C(35) | 58(9)   | 88(9)   | 71(11)  | -13(8)  | 12(8)  | -5(7)  |
| C(36) | 57(8)   | 68(8)   | 53(9)   | -13(7)  | 13(7)  | -4(6)  |
| C(37) | 72(8)   | 63(7)   | 34(8)   | -2(6)   | -12(6) | 4(6)   |
| C(38) | 57(7)   | 56(7)   | 47(8)   | -6(6)   | -21(7) | -4(6)  |
| C(39) | 34(6)   | 31(6)   | 58(7)   | 7(5)    | -6(5)  | -3(5)  |
| C(40) | 60(7)   | 39(6)   | 57(7)   | -1(6)   | -10(5) | -4(6)  |
| C(41) | 57(7)   | 58(8)   | 54(7)   | -7(6)   | -11(6) | -3(6)  |
| C(42) | 59(7)   | 41(6)   | 62(7)   | 1(6)    | -8(6)  | -9(5)  |
| C(43) | 40(6)   | 35(6)   | 54(7)   | -10(5)  | 5(5)   | -8(5)  |
| C(44) | 35(6)   | 48(7)   | 61(7)   | 9(6)    | 3(6)   | 11(6)  |
| C(45) | 42(7)   | 64(8)   | 120(11) | 17(8)   | -15(7) | -10(6) |
| C(46) | 54(7)   | 49(7)   | 38(6)   | 2(5)    | -5(5)  | -7(6)  |
| C(47) | 44(7)   | 58(8)   | 42(7)   | -2(5)   | 16(5)  | -7(6)  |
| C(48) | 49(7)   | 43(7)   | 38(6)   | 1(5)    | 1(5)   | 2(6)   |
| C(49) | 51(7)   | 63(7)   | 38(6)   | 0(5)    | -2(5)  | -3(6)  |
| C(50) | 40(6)   | 72(8)   | 56(7)   | 2(6)    | -2(6)  | -10(7) |
| C(51) | 53(7)   | 67(8)   | 47(6)   | -3(6)   | -5(6)  | -6(6)  |
| C(52) | 61(8)   | 64(9)   | 40(7)   | 3(6)    | -4(6)  | 6(7)   |

|       |         |         |         |         |          |        |
|-------|---------|---------|---------|---------|----------|--------|
| C(53) | 97(10)  | 44(7)   | 96(10)  | 26(7)   | -33(9)   | 2(6)   |
| C(54) | 111(13) | 184(18) | 200(20) | 131(16) | -2(13)   | 15(11) |
| C(55) | 90(9)   | 69(8)   | 96(10)  | 40(7)   | -38(8)   | 5(7)   |
| C(56) | 148(14) | 54(9)   | 250(20) | -24(11) | -125(15) | 16(8)  |
| C(57) | 64(8)   | 82(9)   | 76(9)   | 24(7)   | -20(7)   | -18(7) |
| C(58) | 96(11)  | 149(13) | 92(11)  | -9(10)  | -31(9)   | -17(9) |
| C(59) | 45(7)   | 103(10) | 102(10) | 16(8)   | -12(7)   | -12(6) |
| C(60) | 90(10)  | 102(11) | 135(13) | 38(9)   | -56(9)   | -31(8) |
| C(61) | 105(10) | 99(10)  | 97(10)  | -51(9)  | -10(8)   | 37(8)  |
| C(62) | 104(11) | 102(11) | 165(16) | 58(11)  | -52(10)  | -48(9) |
| F(1)  | 105(5)  | 88(5)   | 92(6)   | 9(4)    | -4(4)    | 46(4)  |
| F(2)  | 113(6)  | 130(6)  | 149(8)  | -46(6)  | 34(6)    | 57(6)  |
| F(3)  | 129(6)  | 149(7)  | 93(6)   | -59(5)  | 57(5)    | -28(5) |
| F(4)  | 122(6)  | 122(6)  | 44(5)   | 9(4)    | 7(4)     | -32(5) |
| F(5)  | 78(4)   | 82(4)   | 61(4)   | 13(4)   | 0(4)     | 14(4)  |
| F(6)  | 87(5)   | 58(4)   | 91(5)   | 7(3)    | 9(4)     | -6(3)  |
| F(7)  | 124(6)  | 63(4)   | 74(5)   | -8(4)   | 16(4)    | -34(4) |
| F(8)  | 109(5)  | 106(5)  | 85(5)   | -12(4)  | -12(4)   | -69(5) |
| F(9)  | 77(5)   | 161(7)  | 157(8)  | -2(6)   | -59(6)   | -34(5) |
| F(10) | 81(5)   | 80(5)   | 148(7)  | 9(5)    | -37(5)   | -11(4) |
| F(11) | 102(5)  | 88(4)   | 45(4)   | -3(3)   | -14(3)   | 40(4)  |
| F(12) | 138(6)  | 93(5)   | 45(4)   | 1(4)    | -13(4)   | 0(4)   |
| F(13) | 105(5)  | 108(6)  | 69(5)   | -18(4)  | 31(4)    | -18(4) |
| F(14) | 72(5)   | 134(6)  | 107(6)  | -11(5)  | 34(4)    | 19(5)  |
| F(15) | 63(4)   | 119(5)  | 80(5)   | 8(4)    | -9(4)    | 29(4)  |

---

The anisotropic displacement factor exponent takes the form:  $-2\pi^2[h^2a^{*2}U^{11} + \dots + 2hka^*b^*U^{12}]$

**Table S6.** Hydrogen coordinates ( $\times 10^4$ ) and isotropic displacement parameters ( $\text{\AA}^2 \times 10^3$ ) for the freebase precursor to **3**

| Atom   | x    | y     | z    | $U_{\text{eq}}$ |
|--------|------|-------|------|-----------------|
| H(1)   | 3519 | 5886  | 1018 | 54              |
| H(3A)  | 3690 | 7066  | 1980 | 55              |
| H(2)   | 5268 | 7541  | 2246 | 133             |
| H(3)   | 5027 | 8624  | 73   | 49              |
| H(4)   | 4998 | 7257  | -825 | 64              |
| H(8)   | 3727 | 4231  | -948 | 65              |
| H(9)   | 2913 | 3677  | -139 | 65              |
| H(13)  | 2001 | 4591  | 2763 | 66              |
| H(14)  | 2211 | 5739  | 3812 | 61              |
| H(18)  | 3610 | 8585  | 4023 | 67              |
| H(19)  | 4223 | 9413  | 3023 | 66              |
| H(40)  | 4097 | 10012 | 731  | 62              |
| H(42)  | 5344 | 11688 | 1377 | 65              |
| H(49)  | 6903 | 7481  | 3243 | 61              |
| H(51)  | 6973 | 10200 | 2976 | 67              |
| H(54A) | 5168 | 12192 | -34  | 246             |
| H(54B) | 4633 | 12466 | -580 | 246             |
| H(54C) | 4851 | 11423 | -564 | 246             |
| H(55A) | 3667 | 12083 | -116 | 127             |
| H(55B) | 3585 | 11343 | 603  | 127             |
| H(55C) | 3864 | 11041 | -251 | 127             |
| H(56A) | 4730 | 12863 | 1191 | 226             |
| H(56B) | 4191 | 12391 | 1601 | 226             |
| H(56C) | 4116 | 13070 | 834  | 226             |
| H(58A) | 7370 | 9363  | 4662 | 168             |
| H(58B) | 7573 | 10178 | 4069 | 168             |
| H(58C) | 8027 | 9530  | 4507 | 168             |

|        |      |       |      |     |
|--------|------|-------|------|-----|
| H(59A) | 8413 | 9312  | 3079 | 125 |
| H(59B) | 7902 | 9824  | 2630 | 125 |
| H(59C) | 8061 | 8790  | 2382 | 125 |
| H(60A) | 7580 | 7671  | 4176 | 164 |
| H(60B) | 8215 | 7986  | 4013 | 164 |
| H(60C) | 7860 | 7512  | 3292 | 164 |
| H(61A) | 6106 | 11216 | 3545 | 151 |
| H(61B) | 5516 | 10686 | 3531 | 151 |
| H(61C) | 5577 | 11665 | 3088 | 151 |
| H(62A) | 6492 | 10920 | 1448 | 185 |
| H(62B) | 6689 | 11308 | 2323 | 185 |
| H(62C) | 6187 | 11799 | 1838 | 185 |

---

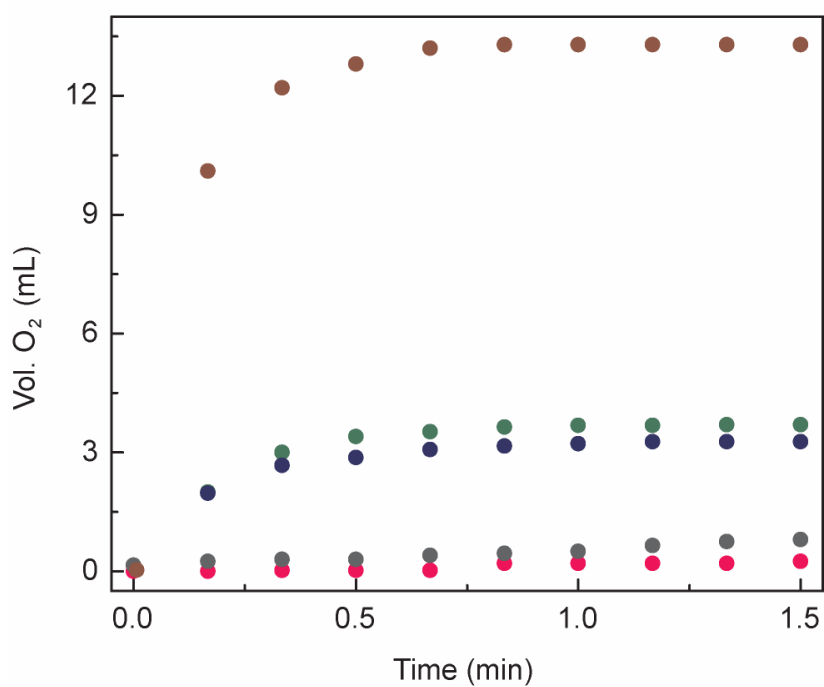

**Figure S1.** Reaction profiles for H<sub>2</sub>O<sub>2</sub> dismutation by Hangman porphyrin xanthene derivatives. Legend: Fe(Cl)TMP (●), Fe(Cl)TMP + PhCO<sub>2</sub>H (●), 1 (●), 2 (●), 3 (●).
